# Supplementary material
Source: PubMed Central journal article supplement (PMC4432063)
Supplement: JCM.03585-14_zjm999094282so1.pdf [file JCM.03585-14_zjm999094282so1.pdf]

## Supplementary Material 1 (S1):

### Minimum Spanning tree based on the diversity of MIRU-15 data

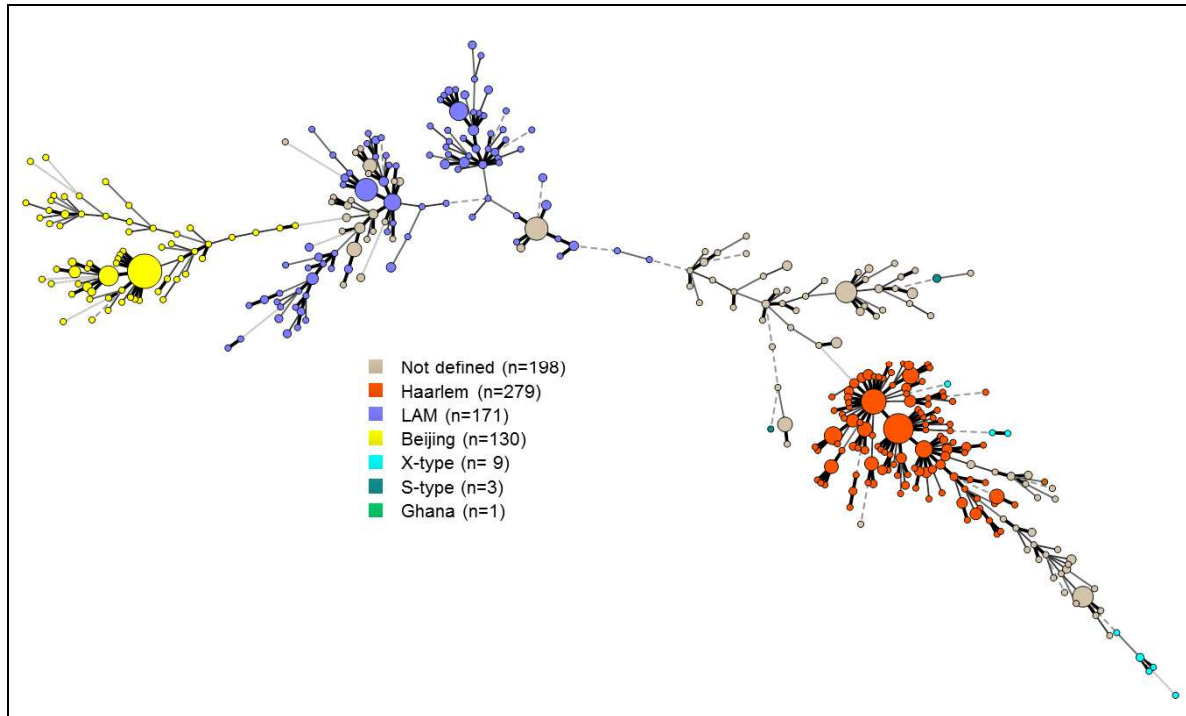

The different complexes identified are coloured (maximum neighbour distance: four changes; minimum size: two MIRU-VNTR types) by the set of 15-loci among the 791 *M. tuberculosis* strains analyzed. The size of each circle is proportional to the number of MIRU-VNTR types belonging to a particular complex. LAM=*M. tuberculosis* Latin American Mediterranean.











**Supplementary Material 3 (S3): Registered TB cases stratified by districts**

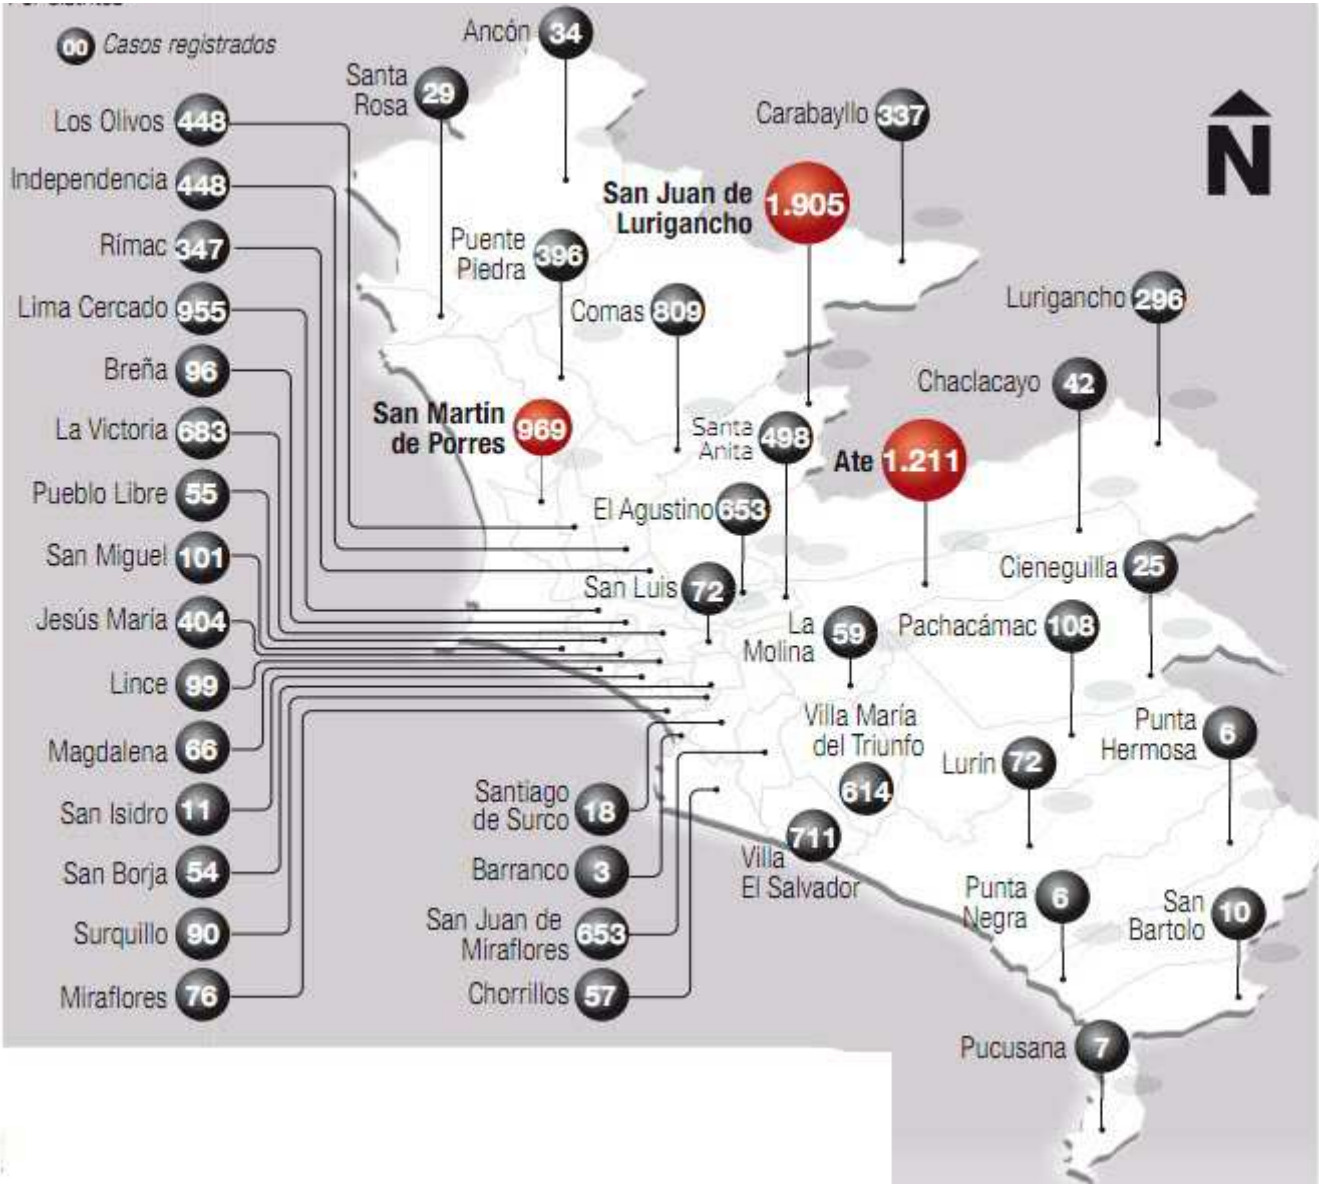

Source: Ministry of Health. Peru. 2011.
